# Supplementary material for: Efficient Photocatalytic Core/Shell of Titanate Nanowire/rGO
Source: Preprints.org preprint supplement (doi:10.20944/preprints202403.0149.v1), 2024-03-04
Supplement: Supplementary file 3 [file supplementary]

Efficient photocatalytic core/shell of titanate nanowire/rGO

Xiaofang Ye,1,‡ Yang Tian,2,‡ Mengyao Gao,1,‡ Fangjun Cheng,1 Jinshen Lan,1 Han Chen,1 Mark Lanoue,3 Shengli Huang,1,2,4* Z. Ryan Tian2,3,4*

1 Engineering Research Center of Micro-nano Optoelectronic Materials and Devices, Ministry of Education, Fujian Key Laboratory of Semiconductor Materials and Applications, CI Center for OSED, Department of Physics, Xiamen University, Xiamen 361005, China

2 Material Science and Engineering, University of Arkansas, Fayetteville, AR 72701, USA

3 Environmental Dynamics, University of Arkansas, Fayetteville, AR 72701, USA

4 Chemistry and Biochemistry, University of Arkansas, Fayetteville, AR 72701, USA

**Contents**

1. Image of Photocatalytic workstation
2. SEM images and EDS spectra of the specimens
3. SAED pattern of the specimens
4. FTIR spectra of the NWs
5. Raman spectra of the specimens
6. XPS of the specimens
7. UV-Vis spectra of the NWs
8. Hyperspectroscopy of the specimens
9. Nitrogen adsorption–desorption isotherm of the specimens
10. Adsorption spectra of the degraded MB solution under visible and UV light irradiation
11. Photocatalytic mechanism
12. Image of photocatalytic study setup.


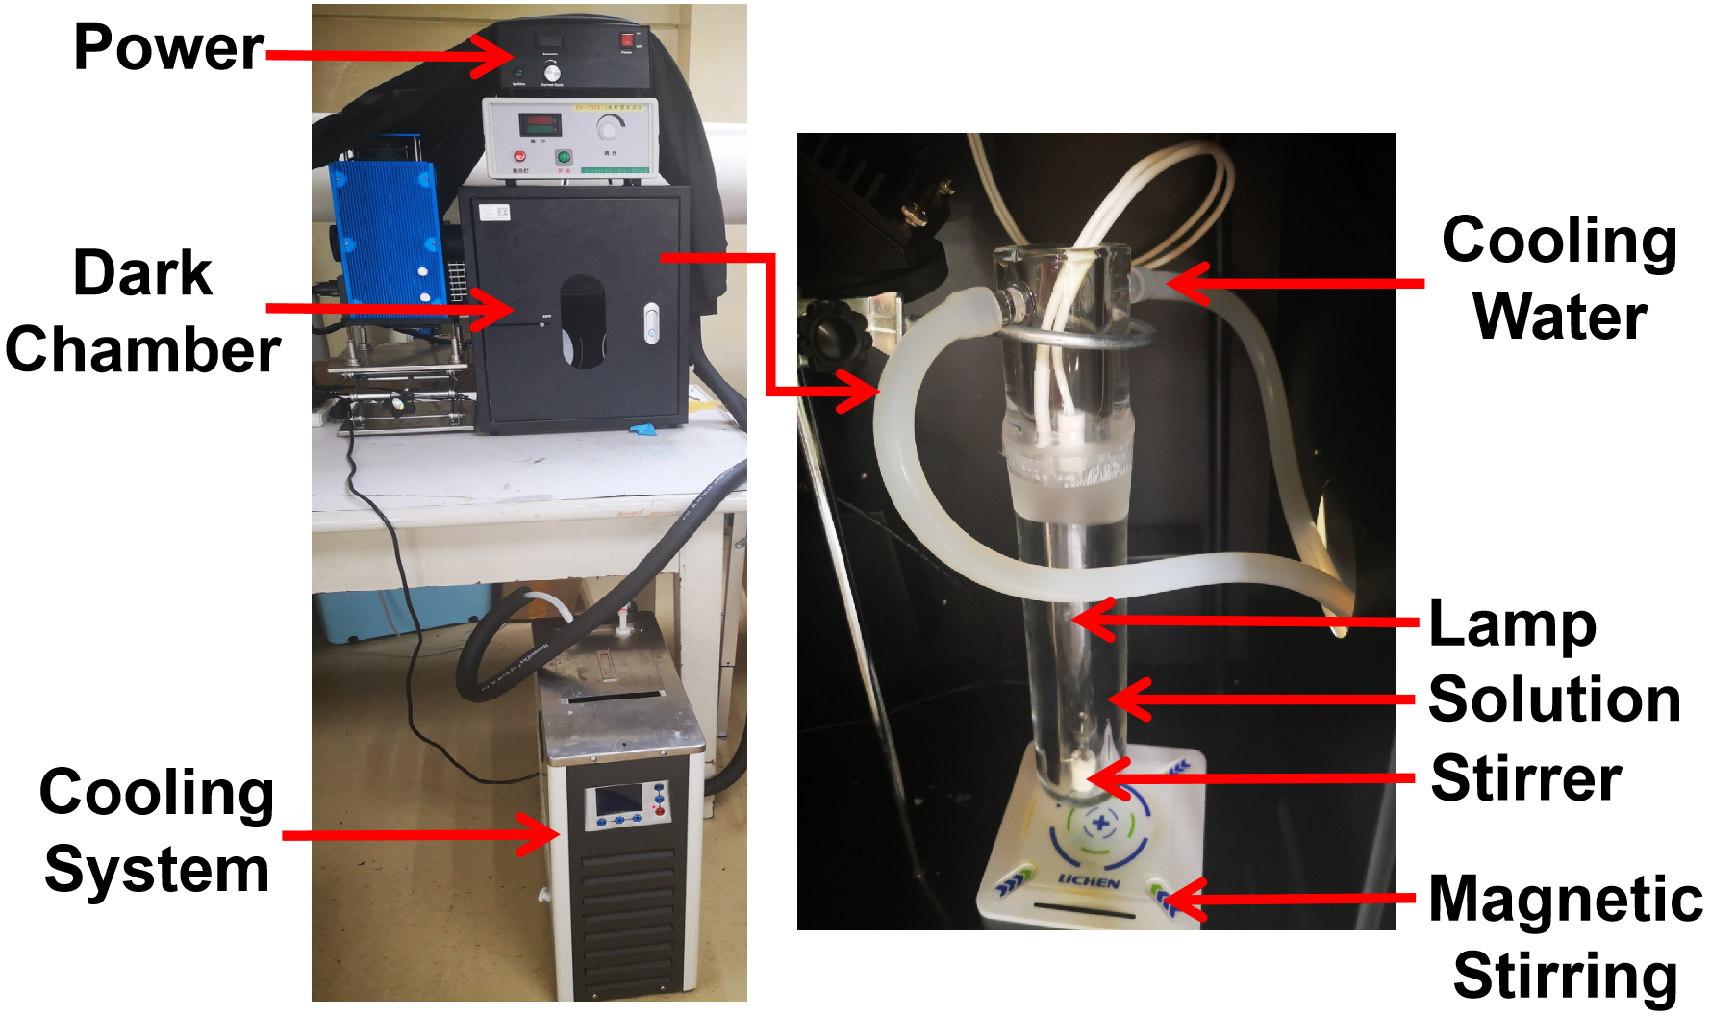


Figure S1. Photocatalytic workstation.

1. SEM images and EDS spectra of the specimens


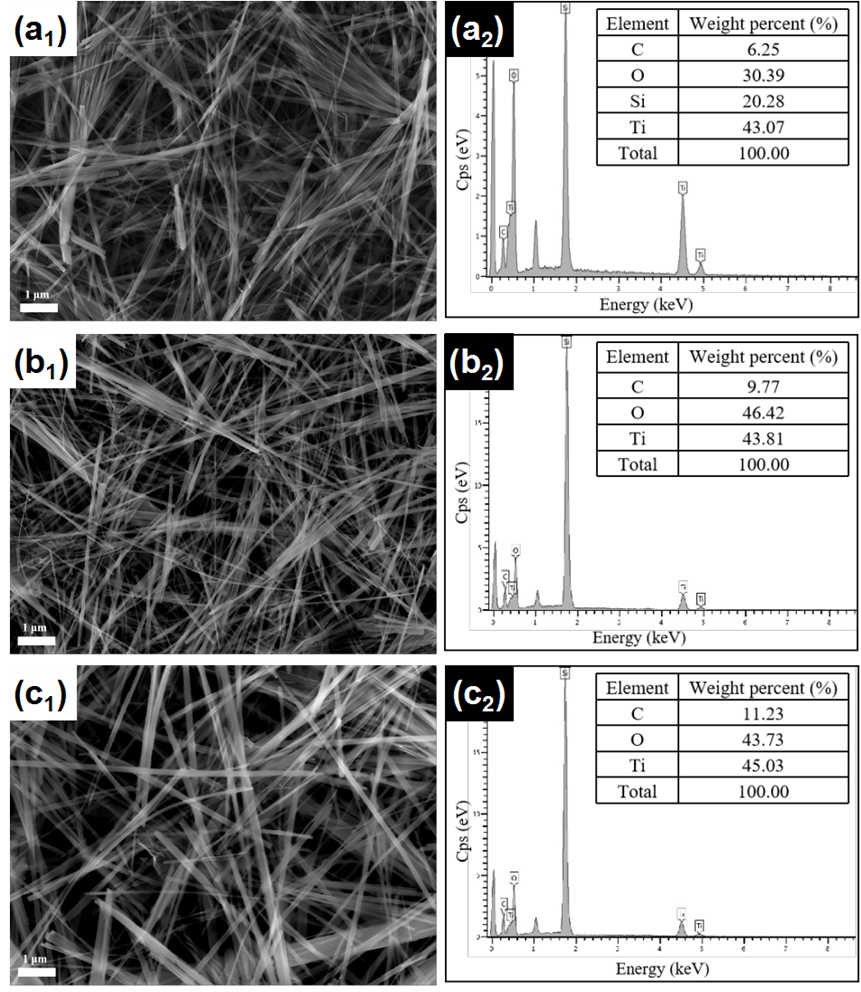


Figure S2. SEM images and EDS spectra of (a1,a2) TiO2 NWs, (b1,b2) TiO2/GO NWs, and (c1,c2) TiO2/rGO NWs.

1. SAED pattern of the specimens


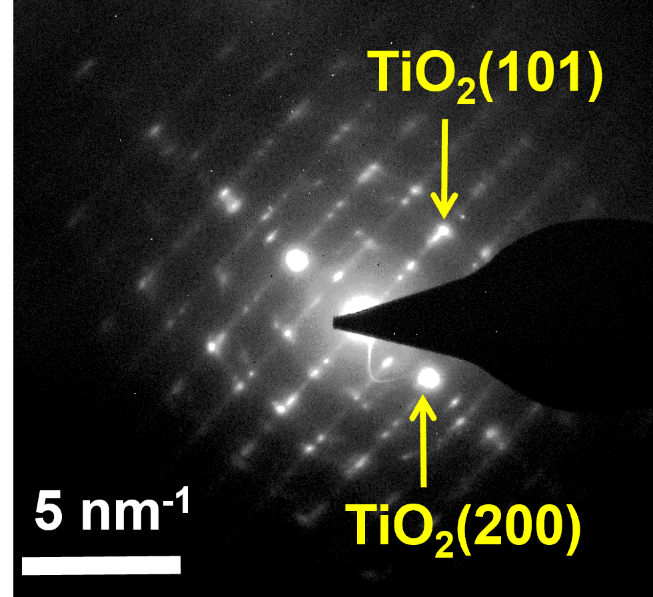


Figure S3. Structural and elemental characterization of the specimens SAED pattern.

1. FTIR spectra of the specimens


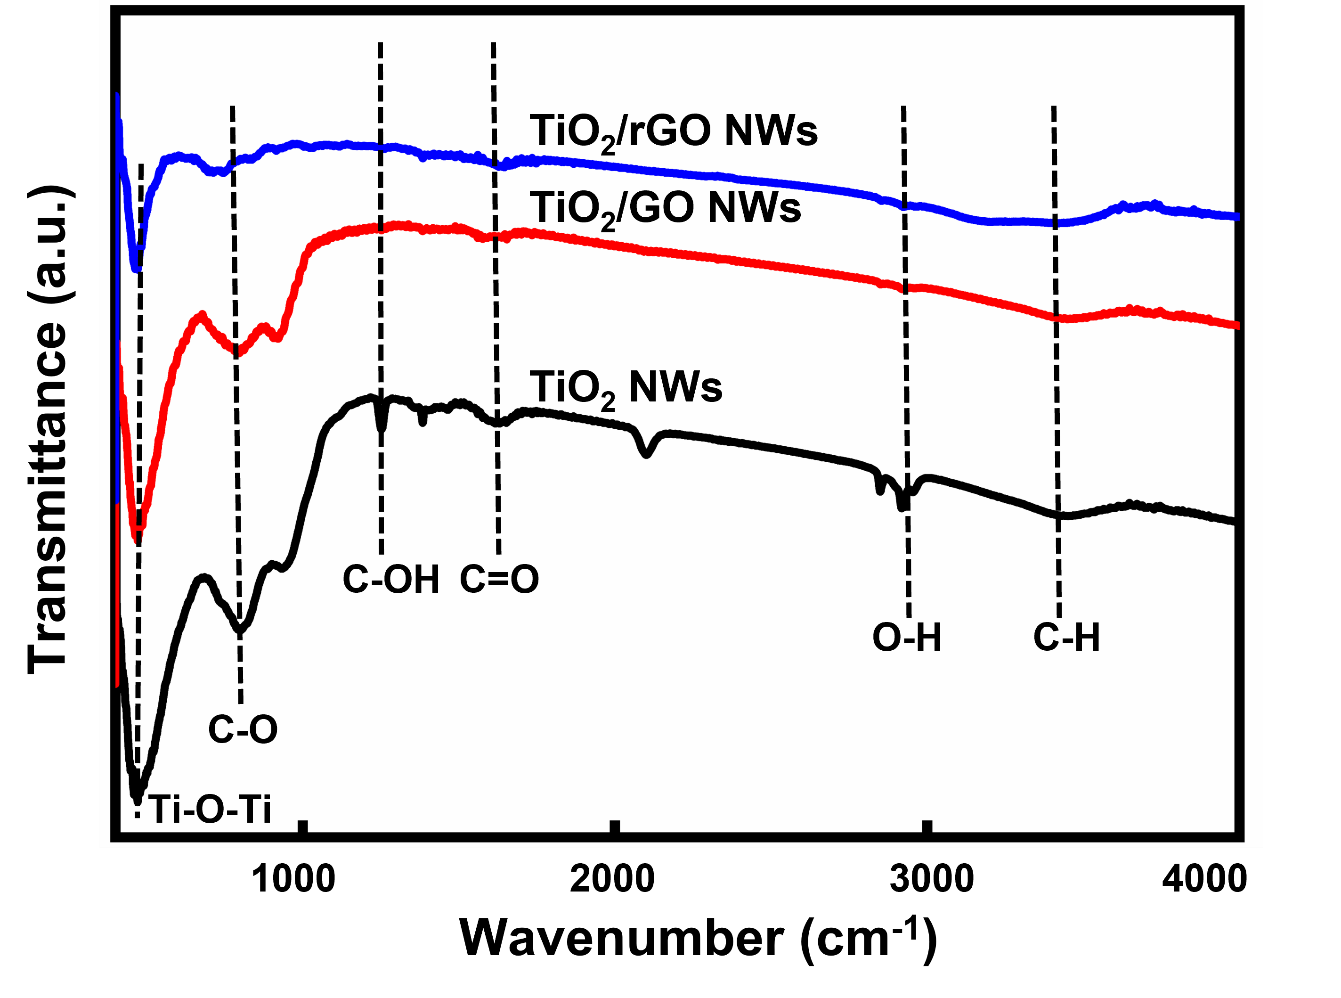


Figure S4. FT-IR spectra of the specimens.

1. Raman spectra of the specimens


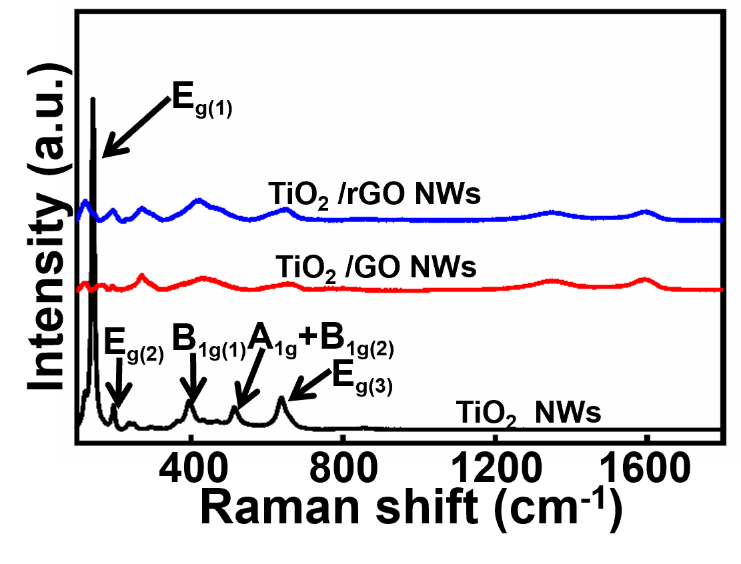


Figure S5. Raman spectra of the specimens.

1. XPS of the specimens


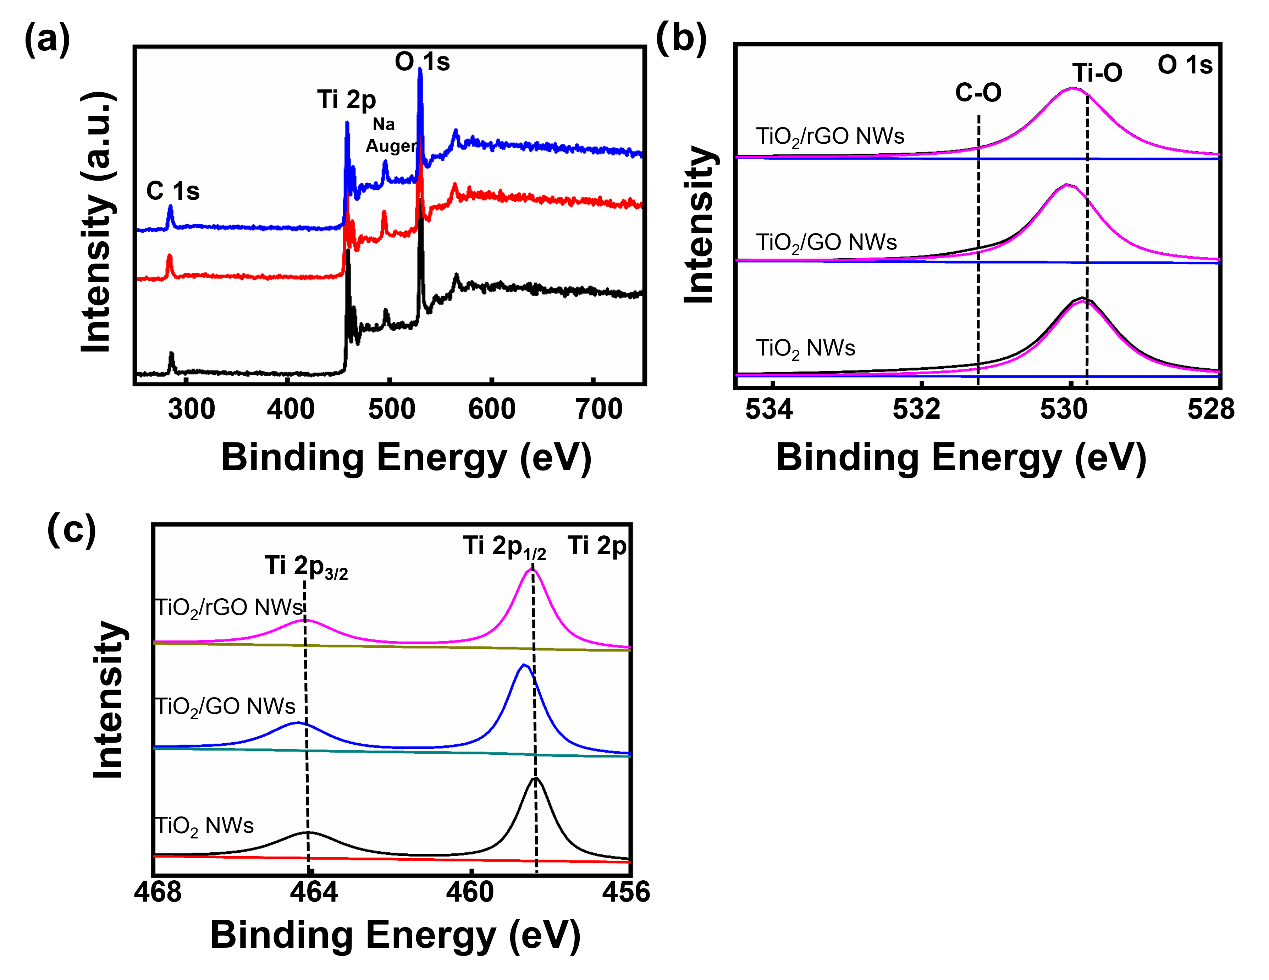


Figure S6. (a) XPS survey spectra; XPS spectra of (b) O 1s, and (c) Ti 2p.

1. UV-Vis spectra of the NWs


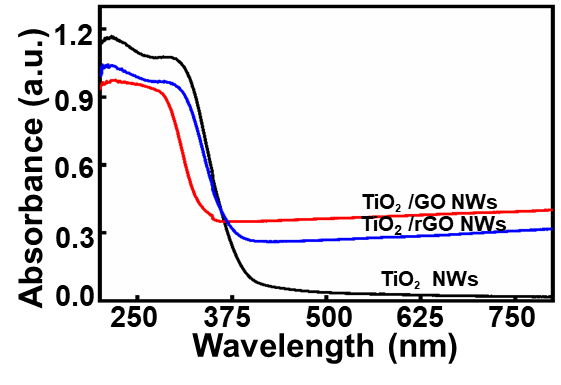


Figure S7. UV-Vis absorption spectra for GO-Titanate NFs, rGO-Titanate NFs, and Titanate NFs.

1. Hyperspectroscopy of the specimens


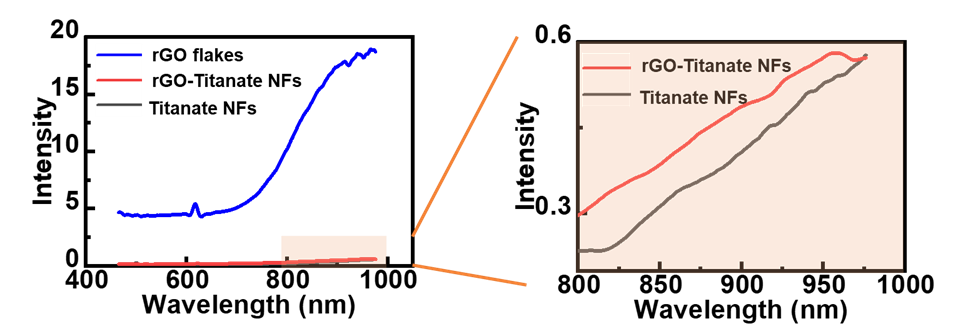


Figure S8. Hyperspectroscopy for rGO flakes, rGO-Titanate NFs, and Titanate NFs.

1. Nitrogen adsorption–desorption isotherm of the specimens


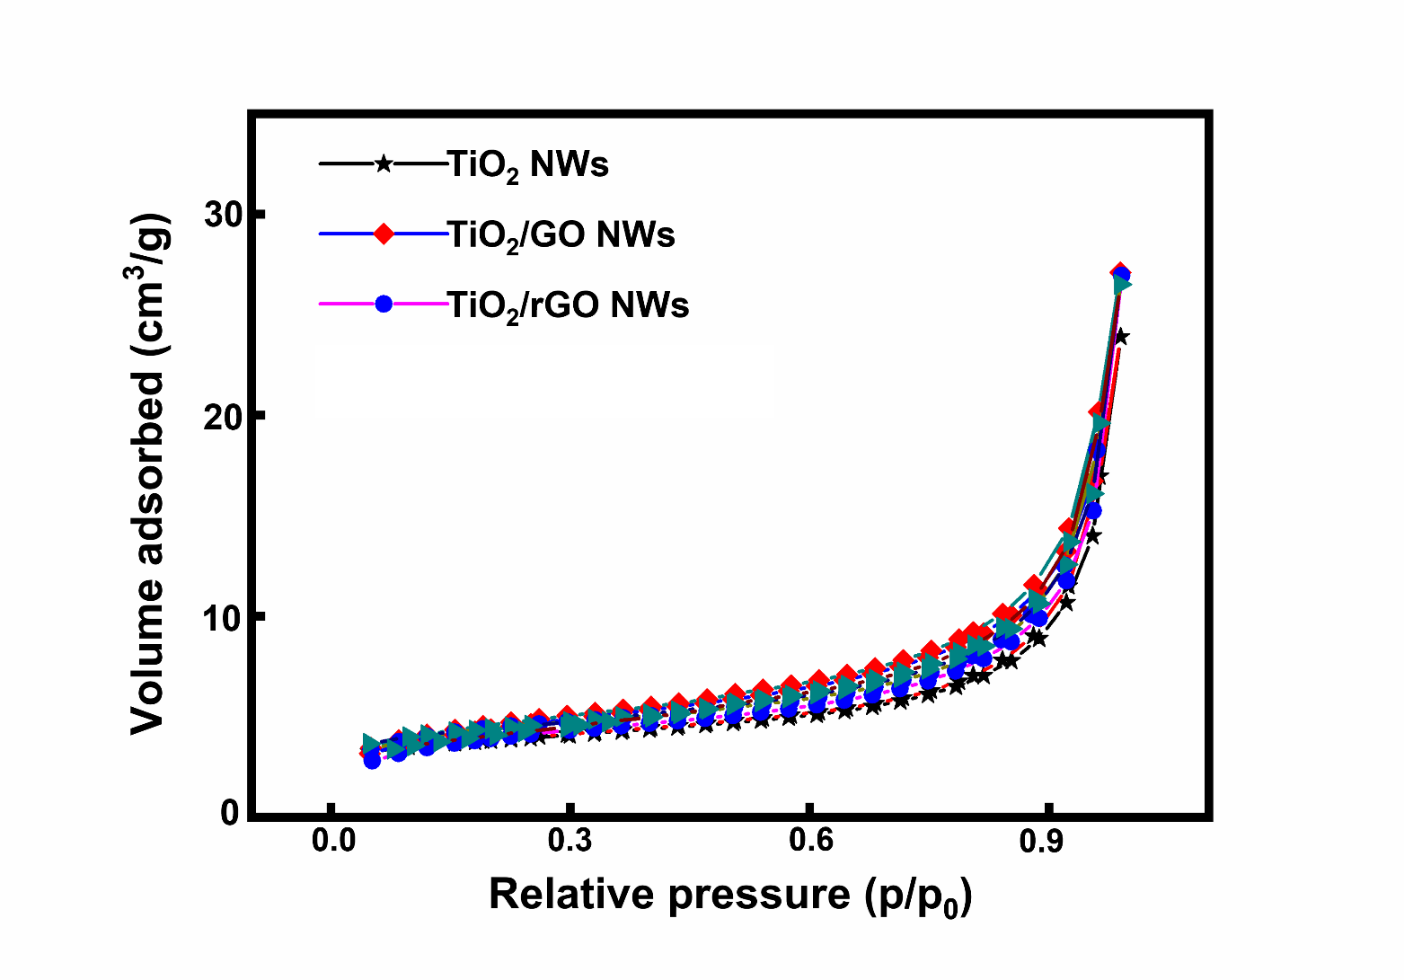


Figure S9. Nitrogen adsorption–desorption isotherm of the specimens

1. Adsorption spectra of the degraded MB solution under visible and UV light irradiation


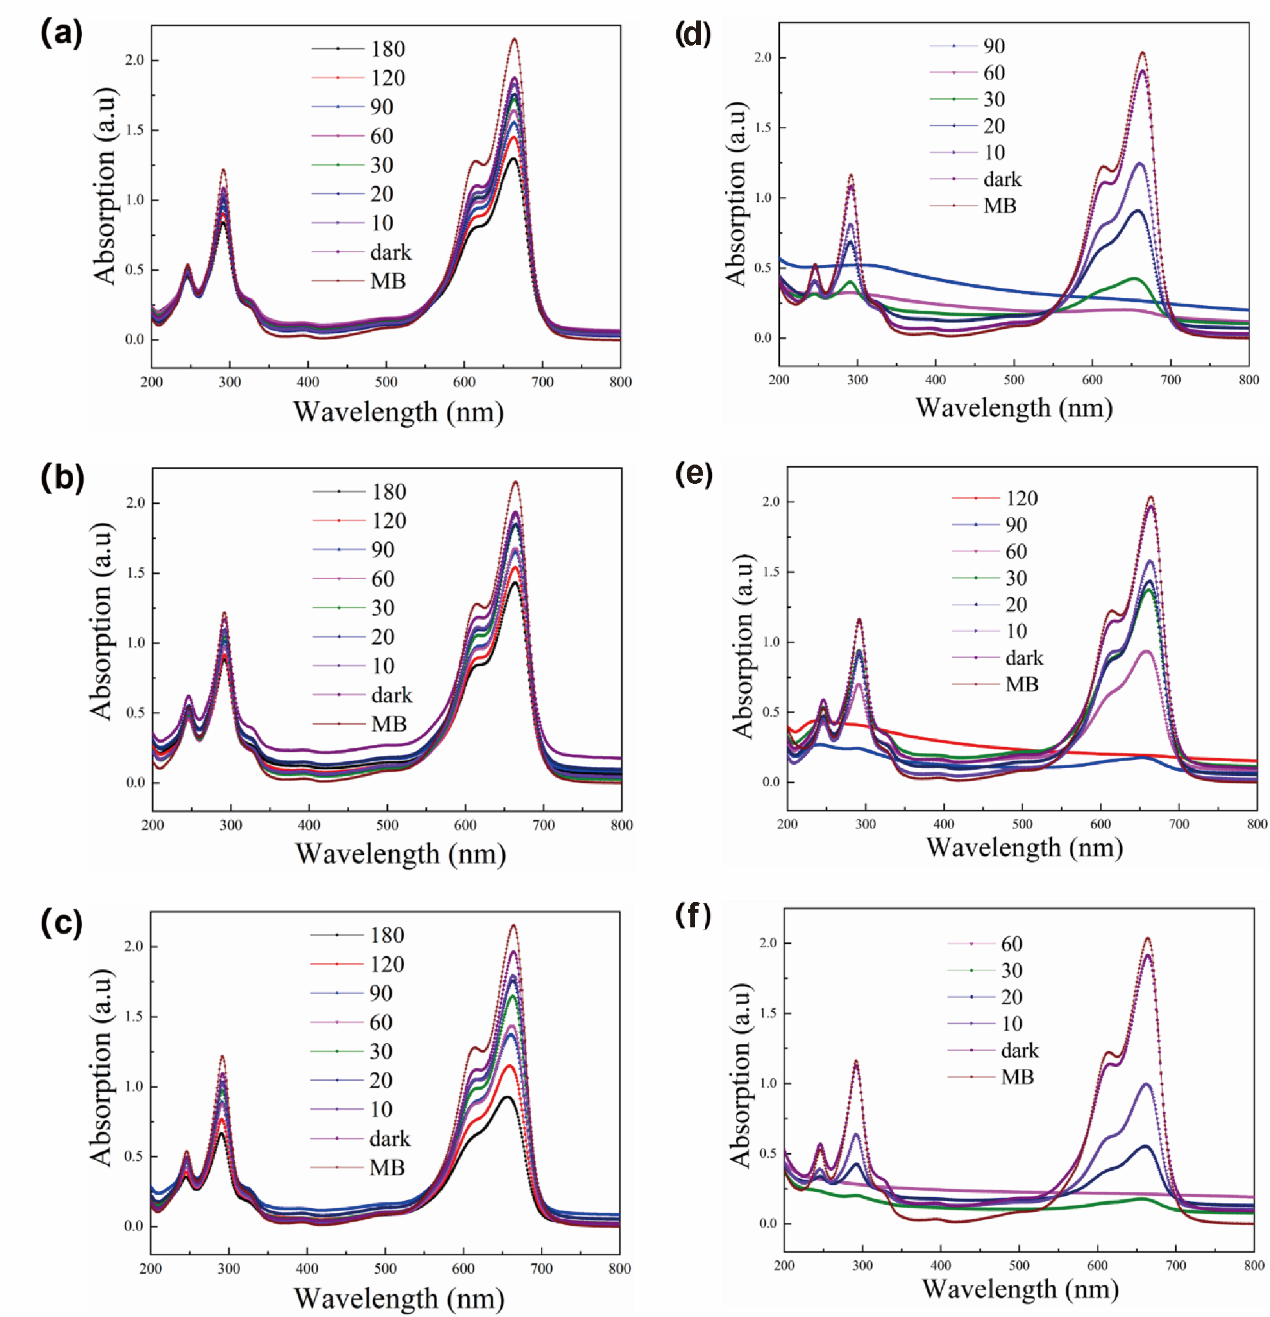


Figure S10. Absorption spectra of degraded MB aqueous solutions as catalyzed by the specimens under visible (a-c) and UV (d-f) light irradiation in different periods: (a)(c) TiO2 NWs, (b)(d) TiO2/GO NWs, and (c)(f) TiO2/rGO NWs.

1. Photocatalytic mechanism


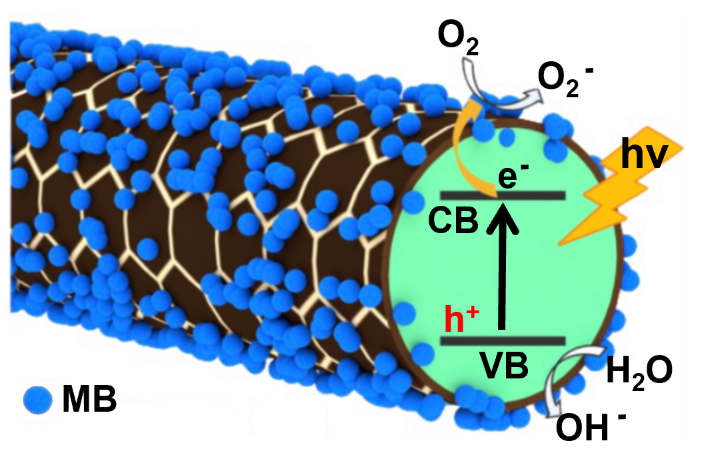


Figure S11. Photocatalytic mechanism.

**References**

1. D. Ma, X. Li, Y. Guo, Y. Zeng, Acta Photonica Sinica 2017, 46, 1216002.
2. E. Kusiak-Nejman, A. W. Morawski, Applied Catalysis B: Environmental 2019, 253, 179.
3. H. Ding, S. Zhang, J. Chen, X. Hu, Z. Du, Y. Qiu, D. Zhao, Thin Solid Films2015, 584, 29.
4. A. Shaikh, S. P. Mishra, P. Mohapatra, S. Parida, Journal of Nanoparticle Research 2017, 19, 206.
5. T.-F. Yeh, J.-M. Syu, C. Cheng, T.-H. Chang, H. Teng, Advanced Functional Materials2010, 20, 2255.
